# Supplementary material
Source: Springer Nature journal article supplement (https://www.springermedizin.de/resource/supplementary/12979_2005_21_MOESM1_ESM.pdf/9603184)

A.

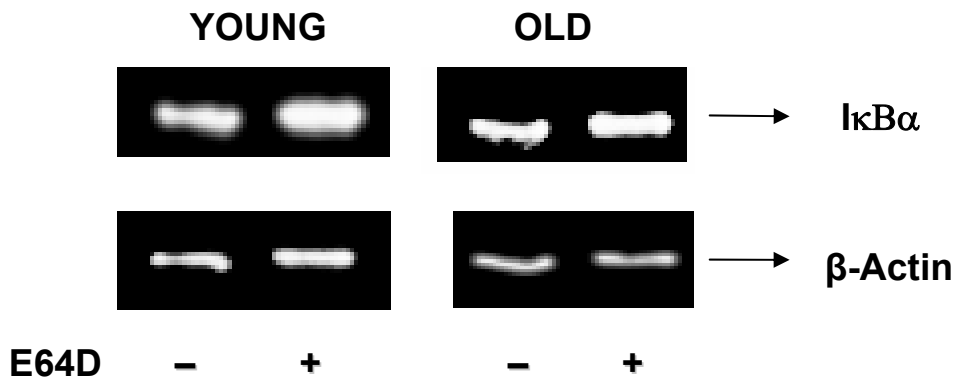

B.

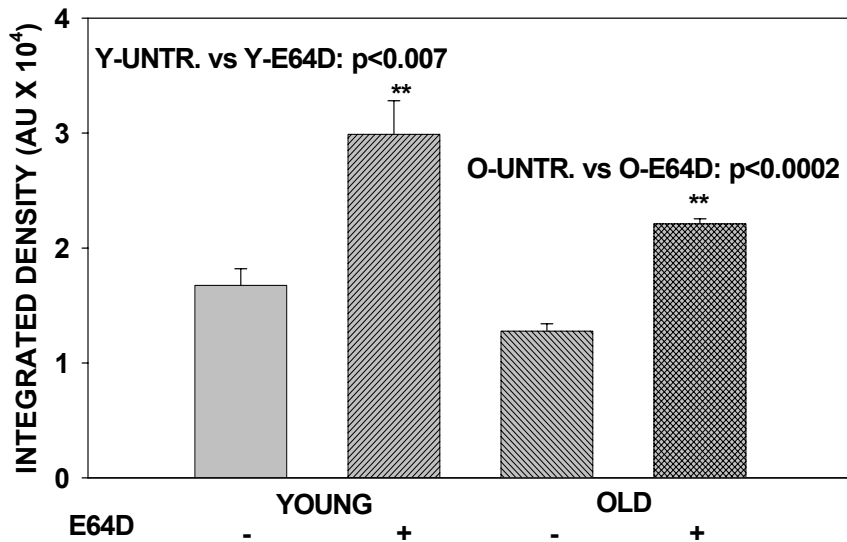

Supplement: MOESM1 [file 9603184]
